# Supplementary material for: Diversity of the Bacterial Community Associated with Hindgut, Malpighian Tubules, and Foam of Nymphs of Two Spittlebug Species (Hemiptera: Aphrophoridae)
Source: MDPI journal article supplement (doi:10.3390/microorganisms11020466), 2023-02-13
Supplement: s1 [file s1]

**Table S1.** Results of BLAST search on sequenced 16S rDNA bands selected from PCR-DGGEs, the accession number of the nearest known bacterial species with a sequence coverage of 100% was reported. Taxonomic identification was achieved by using different sequence similarity thresholds: a similarity  $\geq 97\%$ ,  $\geq 95\%$ ,  $\geq 90\%$ ,  $\geq 85\%$ ,  $\geq 80\%$  and  $\geq 75\%$  for assignment at the species-, genus-, family-, order-, class- and phylum-levels identification, respectively [30]. YP, posterior tubular midgut; MG, filter chamber linked to the conical segment; MT, Malpighian tubules; IL, ileum.

| Band  | Sample                               | Nearest match (GenBank accession no.; % similarity)    | Taxonomical identification           |
|-------|--------------------------------------|--------------------------------------------------------|--------------------------------------|
| Ps-1  | MG of <i>Philaenus spumarius</i>     | <i>Sodalis praecaptivus</i> (AM237373; 97.4%)          | <i>Sodalis praecaptivus</i>          |
| Ps-2  | MG of <i>Philaenus spumarius</i>     | <i>Sodalis glossinidius</i> (LN854557; 97.9%)          | <i>Sodalis glossinidius</i>          |
| Ps-3  | MG of <i>Philaenus spumarius</i>     | <i>Sodalis glossinidius</i> (LN854557; 98.1%)          | <i>Sodalis glossinidius</i>          |
| Ps-4  | MG of <i>Philaenus spumarius</i>     | <i>Escherichia coli</i> (MN083301; 100%)               | <i>Salmonella enterica</i>           |
| Ps-5  | MT of <i>Philaenus spumarius</i>     | <i>Sodalis glossinidius</i> (LN854557; 97.9%)          | <i>Sodalis glossinidius</i>          |
| Ps-6  | MT of <i>Philaenus spumarius</i>     | <i>Rhodococcus gingshengii</i> (MN826591; 100%)        | <i>Rhodococcus gingshengii</i>       |
| Ps-9  | MG of <i>Philaenus spumarius</i>     | <i>Rhodococcus gingshengii</i> (MN826591; 100%)        | <i>Rhodococcus gingshengii</i>       |
| Ps-11 | MT of <i>Philaenus spumarius</i>     | <i>Escherichia coli</i> (MN083301; 100%)               | <i>Salmonella enterica</i>           |
| Lc-18 | YP of <i>Lepyronia coleoptrata</i>   | <i>Rickettsia bellii</i> (KU586119; 99.0%)             | <i>Rickettsia bellii</i>             |
| Lc-19 | YP of <i>Lepyronia coleoptrata</i>   | <i>Rickettsia bellii</i> (KU586119; 99.2%)             | <i>Rickettsia bellii</i>             |
| Lc-20 | MT of <i>Lepyronia coleoptrata</i>   | <i>Rickettsia bellii</i> (KU586119; 98.2%)             | <i>Rickettsia bellii</i>             |
| Lc-21 | IL of <i>Lepyronia coleoptrata</i>   | <i>Escherichia coli</i> (MN083301; 100%)               | <i>Salmonella enterica</i>           |
| Lc-22 | IL of <i>Lepyronia coleoptrata</i>   | <i>Rhodococcus gingshengii</i> (MN826591; 100%)        | <i>Rhodococcus gingshengii</i>       |
| Lc-23 | MT of <i>Philaenus spumarius</i>     | <i>Rhodococcus gingshengii</i> (MN826591; 100%)        | <i>Rhodococcus gingshengii</i>       |
| F-7   | Foam of <i>Lepyronia coleoptrata</i> | <i>Sinorhizobium</i> sp. (CP044012; 96.5%)             | <i>Sinorhizobium</i> sp.             |
| F-9   | Foam of <i>Lepyronia coleoptrata</i> | <i>Erwinia rhapontici</i> (MN826571; 99.7%)            | <i>Erwinia rhapontici</i>            |
| F-10  | Foam of <i>Philaenus spumarius</i>   | <i>Pigmentiphaga humi</i> (MH667611; 99.5%)            | <i>Pigmentiphaga humi</i>            |
| F-11  | Foam of <i>Philaenus spumarius</i>   | <i>Ciceribacter selenitireducens</i> (MH665748; 99.5%) | <i>Ciceribacter selenitireducens</i> |
| F-12  | Foam of <i>Philaenus spumarius</i>   | <i>Devosia oryziradicis</i> (CP068047; 97.2%)          | <i>Devosia oryziradicis</i>          |
| F-13  | Foam of <i>Philaenus spumarius</i>   | <i>Ciceribacter selenitireducens</i> (MH665748; 99.5%) | <i>Ciceribacter selenitireducens</i> |
| F-14  | Foam of <i>Philaenus spumarius</i>   | <i>Erwinia rhapontici</i> (MN826571; 99.7%)            | <i>Erwinia rhapontici</i>            |
| F-15  | Foam of <i>Philaenus spumarius</i>   | <i>Brevundimonas mediterranea</i> (MK250497; 99.7%)    | <i>Brevundimonas mediterranea</i>    |
| F-16  | Foam of <i>Philaenus spumarius</i>   | <i>Ciceribacter azotifigens</i> (KX510117; 97.6%)      | <i>Ciceribacter azotifigens</i>      |
| F-17  | Foam of <i>Philaenus spumarius</i>   | <i>Ciceribacter azotifigens</i> (KX510117; 97.6%)      | <i>Ciceribacter azotifigens</i>      |
| F-18  | Foam of <i>Philaenus spumarius</i>   | <i>Stenotrophomonas rhizoplilia</i> (MT078676; 100%)   | <i>Stenotrophomonas rhizoplilia</i>  |
| F-26  | Foam of <i>Lepyronia coleoptrata</i> | <i>Brevundimonas mediterranea</i> (MK250497; 99.7%)    | <i>Brevundimonas mediterranea</i>    |
| F-28  | Foam of <i>Lepyronia coleoptrata</i> | <i>Rhizobium skierniewicense</i> (MN826327; 99.7%)     | <i>Rhizobium skierniewicense</i>     |
| F-29  | Foam of <i>Lepyronia coleoptrata</i> | <i>Rhizobium skierniewicense</i> (MN826327; 99.7%)     | <i>Rhizobium skierniewicense</i>     |
| F-31  | Foam of <i>Philaenus spumarius</i>   | <i>Ciceribacter azotifigens</i> (KX510117; 97.6%)      | <i>Ciceribacter azotifigens</i>      |
